# Supplementary material for: Searching for phylogenetic patterns of Symbiodiniaceae community structure among Indo-Pacific Merulinidae corals
Source: PeerJ. 2019 Sep 13;7:e7669. doi: 10.7717/peerj.7669 (PMC6746223; doi:10.7717/peerj.7669)
Supplement: Table S1 [file peerj-07-7669-s003.xlsx]

## Sheet: Scleractinia
Ref/No.	Species	Locality	Site	Date	Depth	Repository
FJ019	Goniastrea edwardsi	Fiji	Beqa Lagoon	2010-12-03	10	SIO Co2746
REL0260	Goniastrea edwardsi	Singapore	Raffles Light W	2017-11-14	4	Reef Ecology Lab
SC001	Goniastrea edwardsi	Seychelles	Brissaire Rocks	2011-10-05	16.9	SIO Co2792
SC005	Goniastrea edwardsi	Seychelles	Scala Reef	2011-10-05	8.3	SIO Co2796
SC014	Goniastrea edwardsi	Seychelles	Vacoa Reef	2011-10-07	10.4	SIO Co2803
FJ010	Goniastrea favulus	Fiji	Suva Fish Patch	2010-12-03	11.6	SIO Co2737
FJ039	Goniastrea favulus	Fiji	Caqalai Snake Island	2010-12-05	8.4	SIO Co2765
GB006	Goniastrea favulus	Australia	Pelorus Island SE	2009-05-24	6	MTQ G61877
SC002	Goniastrea minuta	Seychelles	L'ilot	2011-10-05	7	SIO Co2793
SC011	Goniastrea minuta	Seychelles	Grouper Point	2011-10-06	5	SIO Co2801
SC021	Goniastrea minuta	Seychelles	Brissaire Rocks	2011-10-10	11	SIO Co2809
GB008	Goniastrea pectinata	Australia	Orpheus Island NE	2009-05-24	12	MTQ G61879
GB023	Goniastrea pectinata	Australia	Orpheus Island LPnr N	2009-05-26	8	MTQ G61894
REL0061	Goniastrea pectinata	Singapore	Raffles Light W	2017-06-05	4.3	Reef Ecology Lab
REL0305	Goniastrea pectinata	Singapore	Terumbu Pempang Tengah	2017-11-30	6.9	Reef Ecology Lab
REL0323	Goniastrea pectinata	Singapore	Kusu Island	2017-12-01	3.1	Reef Ecology Lab
HD083	Goniastrea retiformis	Singapore	Raffles Light W	2007-01-05	2.6	ZRC.CNI.0155
HD094	Goniastrea retiformis	Singapore	Raffles Light E	2007-01-05	3.9	ZRC.CNI.0160
REL0015	Goniastrea retiformis	Singapore	Raffles Light E	2016-11-17	0	Reef Ecology Lab
SC022	Goniastrea retiformis	Seychelles	Fisherman's Cove	2011-10-12	6	SIO Co2810
SC023	Goniastrea retiformis	Seychelles	Conception Point	2011-10-11	9.1	SIO Co2811
FJ008	Merulina ampliata	Fiji	Suva Fish Patch	2010-12-03	16.3	SIO Co2735
REL0129	Merulina ampliata	Singapore	Pulau Hantu W	2017-07-25	0	Reef Ecology Lab
REL0136	Merulina ampliata	Singapore	Pulau Hantu W	2017-07-25	0	Reef Ecology Lab
REL0157	Merulina ampliata	Singapore	Pulau Hantu W	2017-07-25	0	Reef Ecology Lab
FJ020	Merulina scabricula	Fiji	Beqa Lagoon	2010-12-03	10	SIO Co2747
REL0079	Merulina scabricula	Singapore	Raffles Light W	2017-06-05	3.8	Reef Ecology Lab
REL0199	Merulina scabricula	Singapore	Raffles Light W	2017-08-31	3.8	Reef Ecology Lab
HD060	Scapophyllia cylindrica	Singapore	Raffles Light W	2006-11-29	2.5	ZRC.CNI.0176
REL0261	Scapophyllia cylindrica	Singapore	Raffles Light W	2017-11-14	4	Reef Ecology Lab
